# Supplementary material for: Effects of Reducing Sugars on Colour, Amino Acids, and Volatile Flavour Compounds in Thermally Treated Minced Chicken Carcass Hydrolysate
Source: MDPI journal article supplement (doi:10.3390/foods13070991), 2024-03-24
Supplement: s1 [file s1]

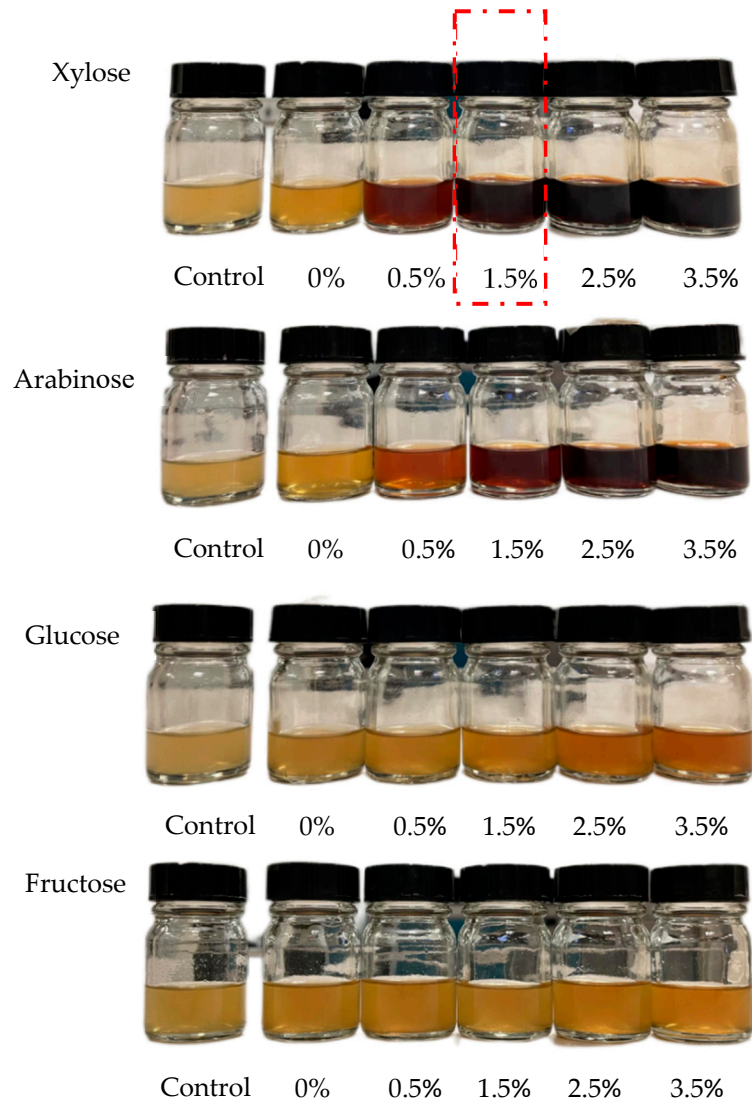

**Figure S1.** Colour changes of unheated control and heat-treated chicken carcass hydrolysates.

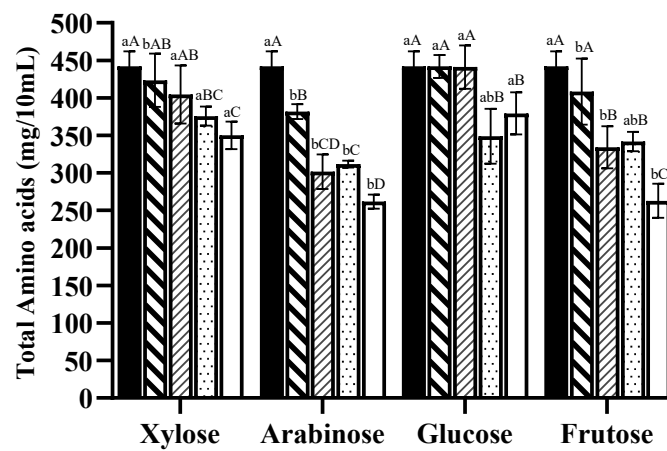

**Figure S2.** Change in total free amino acids in heat-treated samples added with different sugars at different dosages (■ 0%, ▨ 0.5%, ▩ 1.5%, ▪ 2.5%, ▫ 3.5%) after heat treatment at 100 °C for 1 hr. <sup>A,B,C,D</sup> values within the same sugar dosage on different sugars followed by the same letters are not significantly different ( $p > 0.05$ ). <sup>a,b,c,d</sup> values between the different sugar dosages on the same sugar added followed by the same letters are not significantly different ( $p > 0.05$ ).

**Table S1.** Average FID-GC peak areas ( $\times 10^6$ ) and relative peak areas (RPA, %) of volatiles in the blank, control and heated chicken carcass hydrolysates with different added sugars (2.5%).

| Name                               | LRI<br>Exp. | Unheated Control  | Heated<br>Control  | Xylose             | Arabinose          | Glucose            | Fructose           |
|------------------------------------|-------------|-------------------|--------------------|--------------------|--------------------|--------------------|--------------------|
| <i>Sulfur-containing volatiles</i> |             |                   |                    |                    |                    |                    |                    |
| 1 Methional                        | 1083        | -                 | 3.32 $\pm$ 0.31 B  | 8.25 $\pm$ 0.31 A  | 3.93 $\pm$ 0.04 B  | 2.56 $\pm$ 0.05 B  | -                  |
| 2 2-[(methylthio)methyl]-furan     | 1067        | -                 | -                  | 2.48 $\pm$ 0.09    | 2.58 $\pm$ 0.09    | -                  | -                  |
| 3 Dimethyl disulfide               | 1072        | -                 | -                  | 5.14 $\pm$ 0.24    | -                  | -                  | -                  |
| 4 Dimethyl trisulfide              | 1030        | -                 | -                  | 2.74 $\pm$ 0.48    | -                  | -                  | -                  |
| 5 3,4-Dimethyl-thiophene           | 1893        | -                 | -                  | -                  | 0.81 $\pm$ 0.07    | -                  | -                  |
| 6 4-Methoxy-benzenethiol           | 1050        | -                 | -                  | -                  | -                  | 1.23 $\pm$ 0.03    | -                  |
| 7 2-Pentyl-thiophene               | 1075        | -                 | -                  | -                  | -                  | -                  | 3.54 $\pm$ 0.14    |
| <i>Subtotal</i>                    |             | -                 | 3.32 $\pm$ 0.31 C  | 18.61 $\pm$ 1.12 A | 7.32 $\pm$ 0.20 B  | 3.79 $\pm$ 0.08 C  | 3.54 $\pm$ 0.14 C  |
| <i>RPA (%)</i>                     |             | -                 | 1.65%              | 5.76%              | 1.84%              | 0.76%              | 0.62%              |
| <i>Non-sulfur volatiles</i>        |             |                   |                    |                    |                    |                    |                    |
| <i>Acids</i>                       |             |                   |                    |                    |                    |                    |                    |
| 1 Acetic acid                      | 1074        | -                 | -                  | 5.56 $\pm$ 0.41    | 8.11 $\pm$ 0.38    | -                  | 0.80 $\pm$ 0.09    |
| 3 Hexanoic acid                    | 1072        | -                 | -                  | -                  | 3.79 $\pm$ 0.04    | 2.68 $\pm$ 0.04    | 3.05 $\pm$ 0.11    |
| 4 Heptanoic acid                   | 1019        | -                 | -                  | -                  | 2.97 $\pm$ 0.28    | 2.34 $\pm$ 0.19    | 0.96 $\pm$ 0.08    |
| 5 Octanoic acid                    | 1066        | 5.25 $\pm$ 0.64 E | -                  | 9.40 $\pm$ 0.54 C  | 17.08 $\pm$ 0.93 A | 13.05 $\pm$ 0.73 B | 8.48 $\pm$ 0.52 D  |
| 6 Nonanoic acid                    | 1010        | 2.67 $\pm$ 0.11 C | 2.35 $\pm$ 0.16 C  | 3.37 $\pm$ 0.31 B  | 5.12 $\pm$ 0.24 A  | 3.18 $\pm$ 0.40 B  | 3.46 $\pm$ 0.31 B  |
| 7 n-Decanoic acid                  | 1057        | -                 | -                  | 2.04 $\pm$ 0.35    | 1.57 $\pm$ 0.10    | -                  | -                  |
| 8 Benzoic acid                     | 1050        | -                 | 1.31 $\pm$ 0.22 A  | 0.89 $\pm$ 0.06 A  | 1.17 $\pm$ 0.11 A  | 0.93 $\pm$ 0.06 A  | -                  |
| 9 Dodecanoic acid                  | 1067        | -                 | -                  | 3.51 $\pm$ 0.42    | 5.31 $\pm$ 0.37    | -                  | -                  |
| <i>Subtotal</i>                    |             | 7.92 $\pm$ 0.75 F | 15.06 $\pm$ 1.78 E | 24.77 $\pm$ 2.09 B | 45.12 $\pm$ 2.45 A | 22.18 $\pm$ 1.42 C | 16.75 $\pm$ 1.11 D |
| <i>RPA (%)</i>                     |             | 3.59%             | 7.46%              | 8.70%              | 9.05%              | 4.34%              | 2.92%              |
| <i>Alcohols</i>                    |             |                   |                    |                    |                    |                    |                    |
| 1 2-Furanmethanol                  | 1098        | -                 | 5.30 $\pm$ 0.59 B  | 7.54 $\pm$ 0.05 A  | 5.47 $\pm$ 0.09 B  | 4.92 $\pm$ 0.20 B  | 5.55 $\pm$ 0.47 B  |
| 2 1-Pentanol                       | 1040        | 3.31 $\pm$ 0.24   | -                  | -                  | -                  | -                  | -                  |
| 3 3,5-Octadien-2-ol                | 1047        | -                 | -                  | -                  | -                  | -                  | 1.31 $\pm$ 0.10    |
| 4 2,4-Di-tert-butylphenol          | 1073        | -                 | 1.08 $\pm$ 0.06 A  | 2.34 $\pm$ 0.25 A  | 1.31 $\pm$ 0.11 A  | 1.58 $\pm$ 0.19 A  | 1.62 $\pm$ 0.15 A  |
| 5 <i>Subtotal</i>                  |             | 3.31 $\pm$ 0.24 D | 6.38 $\pm$ 0.65 C  | 9.88 $\pm$ 0.30 A  | 6.78 $\pm$ 0.20 C  | 6.50 $\pm$ 0.39 C  | 8.48 $\pm$ 0.72 B  |

| 6  | <i>RPA (%)</i>              |      | 3.25%          | 3.16%          | 3.06%          | 0.33%          | 1.31%          | 1.48%          |
|----|-----------------------------|------|----------------|----------------|----------------|----------------|----------------|----------------|
|    | <i>Aldehydes</i>            |      |                |                |                |                |                |                |
| 1  | 2-Methyl-butanal            | <900 | -              | -              | 79.10 ± 1.43   | -              | -              | -              |
| 2  | 3-Methyl-butanal            | <900 | -              | 3.73 ± 0.52    | -              | -              | -              | -              |
| 3  | Pentanal                    | <900 | 4.52 ± 0.05 B  | 3.15 ± 0.43 C  | -              | -              | 5.30 ± 0.18 B  | 5.39 ± 0.40 A  |
| 4  | Hexanal                     | 1080 | 45.04 ± 0.56 A | 32.77 ± 1.55 D | -              | 11.95 ± 0.25 E | 41.92 ± 0.48 B | 39.89 ± 2.08 C |
| 5  | (E, E)-2,4-Decadienal       | 1088 | -              | 1.72 ± 0.19 B  | 2.12 ± 0.03 B  | 9.89 ± 0.44 A  | 10.80 ± 0.90 A | -              |
| 6  | Furfural                    | 1089 | -              | 1.89 ± 0.06 C  | 57.22 ± 3.72 A | 26.19 ± 1.21 B | -              | -              |
| 8  | Octanal                     | 1061 | 2.24 ± 0.20    | -              | -              | -              | -              | 5.36 ± 0.29    |
| 9  | (E)-2-Heptenal              | 1094 | 2.93 ± 0.15    | -              | -              | -              | -              | -              |
| 10 | Nonanal                     | 1043 | 0.21 ± 0.03 C  | 4.22 ± 0.55 B  | 4.21 ± 0.45 B  | 6.36 ± 0.29 B  | 9.86 ± 0.21 A  | 0.93 ± 0.06 C  |
| 11 | (E)-2-Octenal               | 1065 | -              | -              | -              | -              | 2.25 ± 0.06    | -              |
| 12 | Benzaldehyde                | 1027 | 7.07 ± 1.04 E  | 23.97 ± 3.81 A | 18.08 ± 0.59 B | 15.50 ± 0.30 C | 15.77 ± 0.52 C | 11.62 ± 0.37 D |
| 13 | Benzene acetaldehyde        | 1089 | -              | 2.49 ± 0.16 C  | 13.63 ± 0.61 A | 10.11 ± 0.55 B | 3.29 ± 0.20 C  | -              |
| 14 | 4-Ethyl-benzaldehyde        | 1023 | -              | -              | -              | 2.04 ± 0.10    | -              | 3.12 ± 0.28    |
| 15 | 3-Ethyl-benzaldehyde        | 1024 | -              | -              | -              | -              | 4.73 ± 0.18    | -              |
| 16 | 2,5-Furandicarboxaldehyde   | 1076 | -              | -              | 1.56 ± 0.04    | -              | -              | -              |
| 17 | 3,5-Dimethyl-benzaldehyde   | 1080 | -              | -              | -              | 2.51 ± 0.20    | 4.50 ± 0.44    | -              |
| 18 | 3,4-Dimethyl-benzaldehyde   | 1080 | -              | 3.53 ± 0.38    | 2.15 ± 0.27    | -              | -              | -              |
| 19 | 2,4-Dimethyl-benzaldehyde   | 1078 | -              | -              | -              | -              | -              | 3.11 ± 0.16    |
| 20 | 5-Methyl-2-phenyl-2-hexenal | 1085 | -              | -              | 3.32 ± 0.40    | 2.61 ± 0.10    | -              | -              |
| 21 | 2-Butyl-2-octenal           | 1093 | -              | -              | -              | -              | 2.39 ± 0.12    | 2.54 ± 0.09    |
| 22 | 2-Butylhept-2-enal          | 1045 | -              | -              | -              | -              | -              | 0.90 ± 0.06    |
| 23 | (E)-2-Tridecenal            | 1063 | -              | -              | -              | -              | -              | 1.58 ± 0.18    |
|    | <i>Subtotal</i>             |      | 62.01 ± 2.03   | 77.47 ± 7.65   | 181.39 ± 7.54  | 87.16 ± 3.44   | 100.81 ± 3.29  | 74.44 ± 3.97   |
|    | <i>RPA (%)</i>              |      | 60.88%         | 38.39%         | 56.10%         | 21.88%         | 20.31%         | 12.99%         |
|    | <i>Ketones</i>              |      |                |                |                |                |                |                |
| 1  | 4-Methyl-3-penten-2-one     | 1031 | 7.73 ± 0.50 B  | 30.57 ± 0.77 A | 9.63 ± 0.13 B  | 5.60 ± 0.10 D  | -              | 7.59 ± 0.51 C  |
| 2  | 3-Hexen-2-one               | 1031 | -              | -              | -              | -              | 6.93 ± 0.26    | -              |
| 3  | 2-Heptanone                 | 1071 | 4.80 ± 0.16 C  | 8.25 ± 1.19 B  | 3.24 ± 0.01 C  | 5.62 ± 0.24 C  | 9.78 ± 0.42 B  | 18.38 ± 1.57 A |
| 4  | 2-Methyl-3-Octanone         | 1053 | -              | -              | 2.39 ± 0.03    | -              | -              | -              |
| 5  | 2-Octanone                  | 1057 | 0.31 ± 0.04 B  | 1.31 ± 0.05 B  | 2.38 ± 0.07 B  | 3.37 ± 0.18 B  | 1.58 ± 0.05 B  | 5.10 ± 0.44 A  |
| 6  | 3-Ethylcyclopentanone       | 1098 | 2.85 ± 0.30    | -              | -              | -              | -              | -              |

|                 |                                            |      |                |                |                |                 |                  |                  |
|-----------------|--------------------------------------------|------|----------------|----------------|----------------|-----------------|------------------|------------------|
| 7               | 3-Octen-2-one                              | 1060 | 0.59 ± 0.08 A  | 0.70 ± 0.07 A  | 0.59 ± 0.07 A  | 1.21 ± 0.03 A   | 1.35 ± 0.07 A    | -                |
| 9               | 2,3-Octanedione                            | 1088 | 3.06 ± 0.28    | -              | -              | -               | -                | -                |
| 10              | 2-Nonanone                                 | 1034 | -              | 1.01 ± 0.11 A  | 1.42 ± 0.14 A  | 1.50 ± 0.04 A   | 1.57 ± 0.08 A    | 3.48 ± 0.07 A    |
| 11              | 1-(2-Furanyl)-1-propanone                  | 1053 | -              | -              | 0.82 ± 0.07    | -               | -                | -                |
| 12              | 2-Decanone                                 | 1098 | -              | 1.14 ± 0.15 D  | 1.58 ± 0.07 C  | 2.96 ± 0.16 B   | 2.95 ± 0.04 B    | 8.25 ± 0.35 A    |
| 13              | 1-(2-furanylcyclopropyl)-ethenone          | 1002 | -              | -              | -              | -               | 2.52 ± 0.06      | -                |
| 14              | trans-3-Nonen-2-one                        | 1012 | -              | -              | -              | 3.76 ± 0.37     | 2.47 ± 0.28      | -                |
| 15              | 2-pentyl-2-cyclopenten-1-one               | 1039 | -              | -              | -              | -               | 2.07 ± 0.03      | -                |
| 16              | 2 (5 <i>H</i> )-Furanone                   | 1052 | -              | -              | 1.56 ± 0.18    | 1.42 ± 0.10     | -                | -                |
| 17              | 4-Hydroxy-5-methyl-3(2 <i>H</i> )-furanone | 1001 | -              | -              | 9.87 ± 0.76    | -               | -                | -                |
| <b>Subtotal</b> |                                            |      | 19.34 ± 1.36   | 48.51 ± 2.94   | 33.48 ± 1.53   | 25.44 ± 1.22    | 31.22 ± 1.29     | 43.67 ± 2.99     |
| <b>RPA (%)</b>  |                                            |      | 18.99%         | 24.04%         | 10.36%         | 6.39%           | 6.29%            | 7.62%            |
| <b>Furans</b>   |                                            |      |                |                |                |                 |                  |                  |
| 1               | 2-Ethylfuran                               | <900 | -              | 5.07 ± 0.33 D  | -              | 6.55 ± 0.10 C   | 8.25 ± 1.15 B    | 15.43 ± 1.68 A   |
| 2               | 2-Propyl-Furan                             | 1030 | -              | -              | -              | -               | -                | 4.47 ± 0.34      |
| 3               | 2-Methylfuran                              | <900 | -              | -              | 10.39 ± 0.12   | 1.26 ± 0.12     | -                | -                |
| 4               | 2-n-Butylfuran                             | 1016 | 1.16 ± 0.14    | -              | -              | 3.30 ± 0.15     | 5.33 ± 0.48      | 6.86 ± 0.31      |
| 5               | 2-Pentylfuran                              | 1007 | 11.74 ± 0.90 F | 42.83 ± 1.38 E | 26.96 ± 1.98 D | 203.25 ± 5.02 C | 287.94 ± 19.99 B | 345.52 ± 16.01 A |
| 7               | 2-n-Octylfuran                             | 1019 | -              | 0.69 ± 0.06 A  | 0.72 ± 0.06 A  | 1.56 ± 0.09 A   | 1.46 ± 0.13 A    | 1.07 ± 0.05 A    |
| 8               | cis-2-(2-Pentenyl) furan                   | 1067 | 0.64 ± 0.05 E  | 2.48 ± 0.22 D  | 2.87 ± 0.29 D  | 11.93 ± 2.06 C  | 19.05 ± 2.06 B   | 28.07 ± 2.36 A   |
| 9               | 2-Hexylfuran                               | 1087 | -              | -              | -              | -               | -                | 13.09 ± 1.18     |
| 10              | ( <i>E</i> )-2-(1-pentenyl)-furan          | 1017 | -              | -              | -              | -               | -                | 1.62 ± 0.08      |
| 11              | 2-n-Heptylfuran                            | 1058 | -              | -              | 0.62 ± 0.07 D  | 5.07 ± 0.23 C   | 8.93 ± 0.30 B    | 9.04 ± 0.73 A    |
| 12              | 3-Phenylfuran                              | 1090 | -              | -              | 6.81 ± 0.28 B  | 8.19 ± 0.57 A   | 1.53 ± 0.17 C    | 0.94 ± 0.09 C    |
| <b>Subtotal</b> |                                            |      | 13.54 ± 1.09   | 51.07 ± 1.99   | 51.83 ± 2.86   | 241.11 ± 8.34   | 332.49 ± 24.28   | 426.11 ± 22.83   |
| <b>RPA (%)</b>  |                                            |      | 13.29%         | 25.31%         | 16.03%         | 60.52%          | 66.99%           | 73.37%           |
| <b>Total</b>    |                                            |      | 106.12 ± 4.72  | 201.8 ± 15.86  | 323.32 ± 15.12 | 398.40 ± 15.49  | 496.34 ± 30.60   | 572.99 ± 31.76   |

LRI: linear retention index. -: Compounds not detected. Data are the mean ± SD (n = 3). A–F Values in the same row with different letters were significantly different ( $p < 0.05$ ).
